# Supplementary material for: Synergistic theoretical and experimental study on the ion dynamics of bis(trifluoromethanesulfonyl)imide-based alkali metal salts for solid polymer electrolytes
Source: Royal Society of Chemistry journal article supplement (doi:10.1039/d3cp02989a), 2023-01-01
Supplement: d3cp02989a1.pdf [file d3cp02989a1.pdf]

## Supporting Information

### Synergistic Theoretical and Experimental Study on Ion Dynamics of Bis(trifluoromethanesulfonyl)imide-based Alkali Metal Salts for Solid Polymer Electrolytes

Brigette Althea Fortuin<sup>1,2,3</sup>, Jon Otegi<sup>2</sup>, Juan Miguel López del Amo<sup>1</sup>, Sergio Rodriguez Peña<sup>1,2</sup>, Leire Meabe<sup>1</sup>, Hegoi Manzano<sup>2\*</sup>, María Martínez-Ibañez<sup>1\*</sup> and Javier Carrasco<sup>1,4\*</sup>

<sup>1</sup> Centre for Cooperative Research on Alternative Energies (CIC energiGUNE), Basque Research and Technology Alliance (BRTA), Alava Technology Park, Albert Einstein 48, 01510 Vitoria-Gasteiz, Spain

<sup>2</sup> Department of Physics, University of the Basque Country (UPV/EHU), 48940 Leioa, Spain

<sup>3</sup> ALISTORE-European Research Institute, CNRS FR 3104, Hub de l'Energie, Rue Baudelocque, 80039 Amiens Cedex, France

<sup>4</sup> IKERBASQUE, Basque Foundation for Science, Plaza Euskadi 5, 48009 Bilbao, Spain

\*Javier Carrasco: E-mail: [jcarrasco@cicenergigune.com](mailto:jcarrasco@cicenergigune.com)

\*Maria Martinez-Ibañez: E-mail: [mmartinez@cicenergigune.com](mailto:mmartinez@cicenergigune.com)

\*Hegoi Manzano: E-mail: [hegoi.manzano@ehu.eus](mailto:hegoi.manzano@ehu.eus)

**Table S1:** Force field parameters for PEO (Figure S4 (a)) including non-bonded parameters; atomic point charges ( $q$ ), and Lennard-Jones parameters with C<sub>1</sub> and H<sub>1</sub> referring to the terminal methyl groups of the PEO chains; and bonded parameters used in Gromacs<sup>1,2</sup> and LAMMPS<sup>3,4</sup> simulations.

| Atom           | $q$ (e)                  | $\sigma$ (Å) | $\epsilon$ ( $kJ\ mol^{-1}$ ) | Bond | $r_0$ (Å)                | $k_r$ ( $kJ\ mol^{-1}\ \text{Å}^{-2}$ ) | Angle                    | $\theta_0$ (degree) | $k_\theta$ ( $kJ\ mol^{-1}\ rad^{-2}$ ) |
|----------------|--------------------------|--------------|-------------------------------|------|--------------------------|-----------------------------------------|--------------------------|---------------------|-----------------------------------------|
| C <sub>1</sub> | -0.18                    | 3.50         | 0.276                         | C-C  | 1.529                    | 2242.624                                | C-C-H                    | 110.7               | 313.800                                 |
| H <sub>1</sub> | 0.06                     | 2.50         | 0.126                         | C-H  | 1.090                    | 2845.120                                | H-C-H                    | 107.8               | 276.144                                 |
| C <sub>2</sub> | 0.14                     | 3.50         | 0.276                         | C-O  | 1.410                    | 2677.760                                | H-C-O                    | 109.5               | 292.880                                 |
| H <sub>2</sub> | 0.03                     | 2.50         | 0.126                         |      |                          |                                         | C-C-O                    | 109.5               | 418.400                                 |
| O              | -0.40                    | 2.90         | 0.586                         |      |                          |                                         | C-O-C                    | 109.5               | 502.080                                 |
|                |                          |              |                               |      |                          |                                         | C-C-C                    | 112.7               | 488.273                                 |
| Dihedral       | $V_1$ ( $kJ\ mol^{-1}$ ) |              | $V_2$ ( $kJ\ mol^{-1}$ )      |      | $V_3$ ( $kJ\ mol^{-1}$ ) |                                         | $V_4$ ( $kJ\ mol^{-1}$ ) |                     |                                         |
| C-C-O-C        | 1.7154                   |              | 2.8451                        |      | 1.0460                   |                                         | -5.6066                  |                     |                                         |
| H-C-C-H        | 0.6276                   |              | 1.8828                        |      | 0.0                      |                                         | -2.5104                  |                     |                                         |
| H-C-C-O        | 0.9791                   |              | 2.9370                        |      | 0.0                      |                                         | -3.9162                  |                     |                                         |
| H-C-O-C        | 1.5899                   |              | 4.7698                        |      | 0.0                      |                                         | -6.3597                  |                     |                                         |
| O-C-C-O        | -1.1506                  |              | 1.1506                        |      | 0.0                      |                                         | 0.0                      |                     |                                         |
| C-C-C-H        | 0.6276                   |              | 1.8828                        |      | 0.0                      |                                         | -2.5104                  |                     |                                         |
| C-C-C-O        | 2.8744                   |              | 0.5816                        |      | 2.0920                   |                                         | -5.5480                  |                     |                                         |

**Table S2:** Force field parameters for XTSEFI (Figure S4 (b)) including non-bonded parameters; Lennard-Jones parameters; and bonded parameters used in both GROMACS<sup>1,2,5,6</sup> and LAMMPS simulations<sup>2,5,6</sup>.

| Atom     | $\sigma$ (Å) | $\varepsilon$ ( $kJ mol^{-1}$ ) | Bond                    | $r_0$ (Å)               | $k_r$ ( $kJ mol^{-1} \text{Å}^{-2}$ ) | Angle                   | $\theta_0$ (degree) | $k_\theta$ ( $kJ mol^{-1} rad^{-2}$ ) |
|----------|--------------|---------------------------------|-------------------------|-------------------------|---------------------------------------|-------------------------|---------------------|---------------------------------------|
| F        | 2.95         | 0.22175                         | C-F                     | 1.332                   | 3071.056                              | F-C-F                   | 109.1               | 644.336                               |
| C        | 3.50         | 0.27614                         | C-S                     | 1.770                   | 2845.120                              | F-C-S                   | 109.5               | 418.400                               |
| S        | 3.55         | 1.04600                         | N-S                     | 1.670                   | 3631.712                              | C-S-N                   | 103.0               | 836.800                               |
| O        | 2.96         | 0.71128                         | O-S                     | 1.440                   | 5857.600                              | C-S-O                   | 108.9               | 619.232                               |
| N        | 3.25         | 0.71128                         |                         |                         |                                       | N-S-O                   | 107.0               | 1004.160                              |
| Li       | 2.13         | 0.07600                         |                         |                         |                                       | O-S-O                   | 119.0               | 870.232                               |
| Na       | 3.33         | 0.01598                         |                         |                         |                                       | S-N-S                   | 125.6               | 671.000                               |
| K        | 4.94         | 0.00137                         |                         |                         |                                       |                         |                     |                                       |
| Cs       | 6.72         | 0.00034                         |                         |                         |                                       |                         |                     |                                       |
| Dihedral |              |                                 | $V_1$ ( $kJ mol^{-1}$ ) | $V_2$ ( $kJ mol^{-1}$ ) | $V_3$ ( $kJ mol^{-1}$ )               | $V_4$ ( $kJ mol^{-1}$ ) |                     |                                       |
| F-C-S-N  |              |                                 | 0.6610                  | 1.9830                  | 0.0000                                | -2.6440                 |                     |                                       |
| F-C-S-O  |              |                                 | 0.7255                  | 2.1765                  | 0.0000                                | -2.9020                 |                     |                                       |
| S-N-S-C  |              |                                 | 45.4636                 | -36.3221                | -18.7348                              | 5.5755                  |                     |                                       |
| S-N-S-O  |              |                                 | -0.0075                 | -0.0225                 | 0.0000                                | 0.0300                  |                     |                                       |
| F-C-S-N  |              |                                 | 0.6610                  | 1.9830                  | 0.0000                                | -2.6440                 |                     |                                       |

**Table S3:** Lithium-ion molecular speciation as a function of LiTFSI salt concentration.

| EO/Li <sup>+</sup> ratio | Isolated Li <sup>+</sup> (%) | Li <sup>+</sup> – O <sup>-</sup> (TFSI <sup>-</sup> ) (%) | Li <sup>+</sup> – O <sup>-</sup> (PEO) (%) | Li <sup>+</sup> – O <sup>-</sup> ( $\text{PEO}^{\text{TFSI}^-}$ ) (%) |
|--------------------------|------------------------------|-----------------------------------------------------------|--------------------------------------------|-----------------------------------------------------------------------|
| 6:1                      | 0                            | 0.04                                                      | 76.55                                      | 23.44                                                                 |
| 16:1                     | 0                            | 0                                                         | 98.05                                      | 1.95                                                                  |
| 20:1                     | 0                            | 0                                                         | 98.60                                      | 1.40                                                                  |
| 32:1                     | 0                            | 0                                                         | 99.04                                      | 0.96                                                                  |

**Table S4:** Measured parameters and calculated lithium-ion transference and transport numbers based on EIS and MD, respectively, for PEO<sub>n</sub>/LiTFSI SPEs at 70 °C.

| EO/Li <sup>+</sup> ratio | $i_i$ (μA) | $I_{ss}$ (μA) | $R_{\text{Li}^+, \text{initial}}$ (Ω) | $R_{\text{Li}^+, \text{ss}}$ (Ω) | $\Delta V$ (mV) | $T_{\text{Li}^+}^{\text{EIS}}$ | $t_{\text{Li}^+}^{\text{MD}}$ |
|--------------------------|------------|---------------|---------------------------------------|----------------------------------|-----------------|--------------------------------|-------------------------------|
| 6:1                      | 2          | 9             | 313                                   | 348                              | 10              | 0.16 ± 0.025                   | 0.22                          |
| 16:1                     | 4          | 2             | 201                                   | 193                              |                 | 0.22 ± 0.024                   | 0.31                          |
| 20:1                     | 145        | 67            | 43                                    | 40                               |                 | 0.24 ± 0.024                   | 0.31                          |
| 32:1                     | 83         | 37            | 101                                   | 107                              |                 | 0.22 ± 0.026                   | 0.30                          |
| 64:1                     | 105        | 51            | 53                                    | 32                               |                 | 0.26 ± 0.025                   | -                             |

**Table S5:** Thermal properties of neat PEO and PEO<sub>n</sub>/LiTFSI SPEs.

| EO/Li <sup>+</sup> ratio | $T_g$ (°C) | $T_m$ (°C) | $\Delta H_m$ (J g <sup>-1</sup> ) | $\chi_c$ |
|--------------------------|------------|------------|-----------------------------------|----------|
| Neat PEO                 | –          | 67         | 117                               | 57       |
| 6:1                      | –26        | 55         | 3                                 | 6        |
| 16:1                     | –35        | 49         | 52                                | 36       |
| 20:1                     | –35        | 55         | 70                                | 45       |
| 32:1                     | –43        | 56         | 84                                | 49       |
| 64:1                     | –          | 62         | 104                               | 56       |

**Table S6:** Raman Spectroscopy peak deconvolution analysis as a function of temperature and LiTFSI salt concentration.

| EO/Li <sup>+</sup> ratio | 25 °C (non-preheated)  |                       | 40 °C                  |                       | 70 °C                  |                       |
|--------------------------|------------------------|-----------------------|------------------------|-----------------------|------------------------|-----------------------|
|                          | Dissociated LiTFSI (%) | Associated LiTFSI (%) | Dissociated LiTFSI (%) | Associated LiTFSI (%) | Dissociated LiTFSI (%) | Associated LiTFSI (%) |
| 6:1                      | 90                     | 10                    | 85                     | 15                    | 77                     | 23                    |
| 16:1                     | 100                    | 0                     | 93                     | 7                     | 96                     | 4                     |
| 20:1                     |                        |                       | 100                    | 0                     | 100                    | 0                     |
| 32:1                     |                        |                       | 100                    | 0                     | 100                    | 0                     |
| 64:1                     |                        |                       | 100                    | 0                     | 100                    | 0                     |

**Table S7:** Linewidth, chemical shifts, and deconvolution values of the  $^7\text{Li}$  MAS-NMR spectra from Figure 4. Narrower components are highlighted in orange, while broader components are highlighted in white.

| Temperature (°C) | Linewidth (Hz)           |                           | Chemical shift (ppm)     |                           | Deconvoluted spectra (%) |                           |
|------------------|--------------------------|---------------------------|--------------------------|---------------------------|--------------------------|---------------------------|
|                  | PEO <sub>6</sub> /LiTFSI | PEO <sub>32</sub> /LiTFSI | PEO <sub>6</sub> /LiTFSI | PEO <sub>32</sub> /LiTFSI | PEO <sub>6</sub> /LiTFSI | PEO <sub>32</sub> /LiTFSI |
| 40               | 12                       | 15                        | -1.37                    | -1.45                     | 47                       | 46                        |
|                  | 365                      | 167                       | -1.23                    | -1.54                     | 53                       | 54                        |
| 50               | 9                        | 12                        | -1.35                    | -1.44                     | 43                       | 48                        |
|                  | 175                      | 70                        | -1.34                    | -1.48                     | 56                       | 52                        |
| 60               | 7                        | 10                        | -1.35                    | -1.42                     | 36                       | 63                        |
|                  | 84                       | 39                        | -1.35                    | -1.44                     | 64                       | 38                        |
| 70               | 6                        | 9                         | -1.35                    | -1.41                     | 32                       | 100                       |
|                  | 40                       |                           | -1.36                    |                           | 68                       | 0                         |
| 80               | 6                        | 9                         | -1.34                    | -1.40                     | 33                       | 100                       |
|                  | 28                       |                           | -1.34                    |                           | 67                       | 0                         |

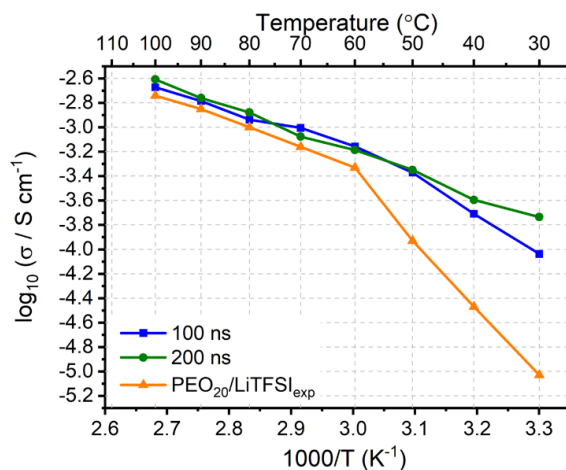

**Figure S1:** Ionic conductivity of PEO<sub>20</sub>/LiTFSI simulated for 100 and 200 ns, compared to experimental values obtained from literature<sup>7</sup>.

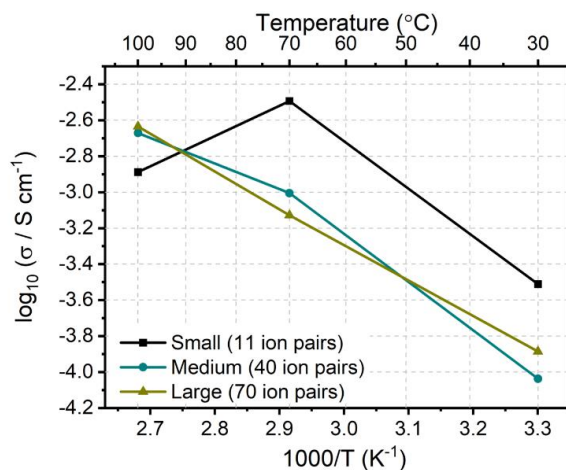

**Figure S2:** Ionic conductivity of PEO<sub>20</sub>/LiTFSI at different temperatures for three simulation box sizes: small (11 ion pairs), medium (40 ion pairs), and large (70 ion pairs).

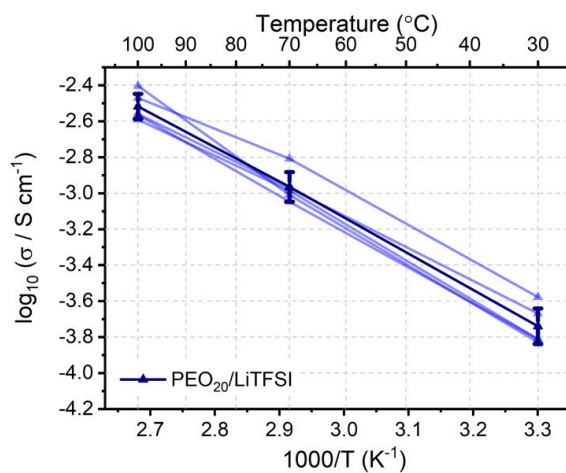

**Figure S3:** Ionic conductivity of PEO<sub>20</sub>/LiTFSI at different temperatures with different initial conditions modelled with a medium sized simulation box. The error for the ionic conductivity at each studied temperature is ~ 30 %.

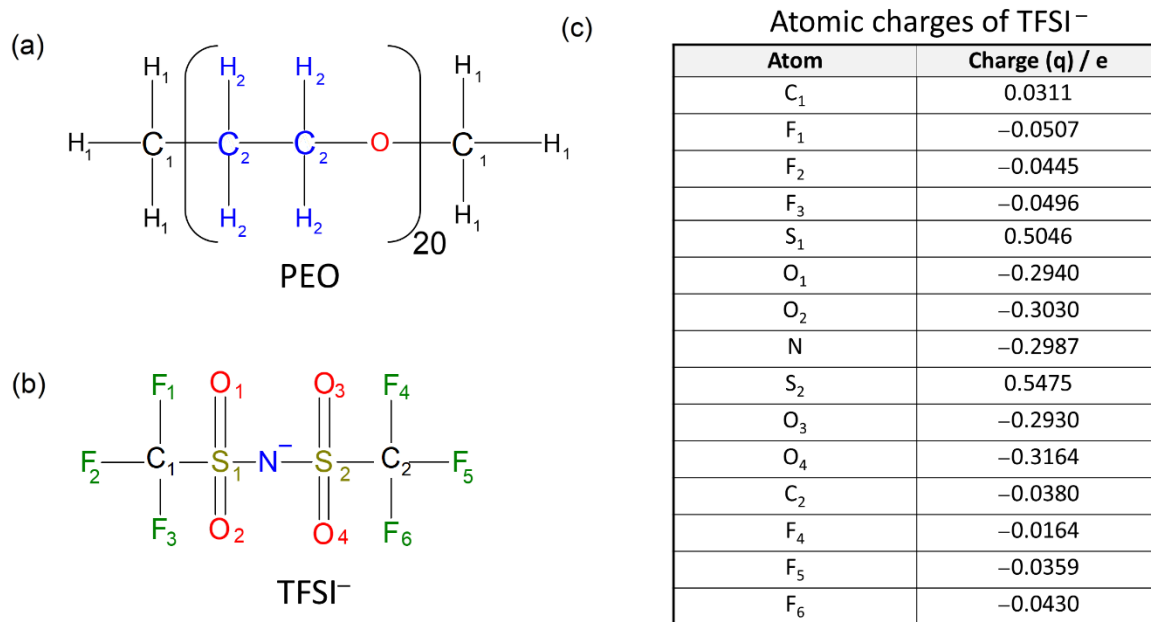

**Figure S4:** Chemical structures of (a) PEO and (b) TFSI<sup>-</sup> with the corresponding adopted acronyms, and (c) the atomic charges of each atom found in TFSI<sup>-</sup>, utilized in MD simulations (Tables S1 – S2).

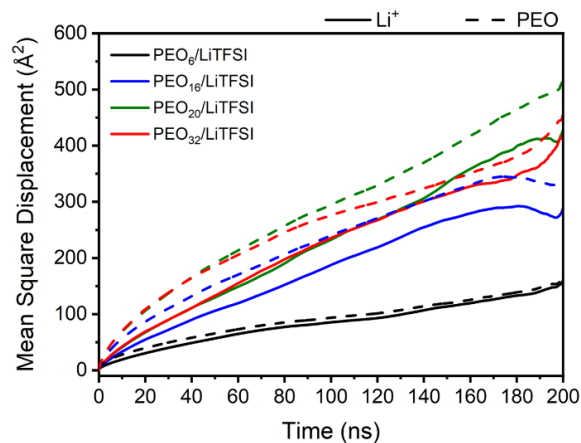

**Figure S5:** Mean square displacement functions of lithium-ions (solid line) and PEO (dashed line) as a function of LiTFSI salt for the studied  $\text{PEO}_n/\text{LiTFSI}$  SPEs, where  $n = 6, 16, 20,$  or  $32$ .

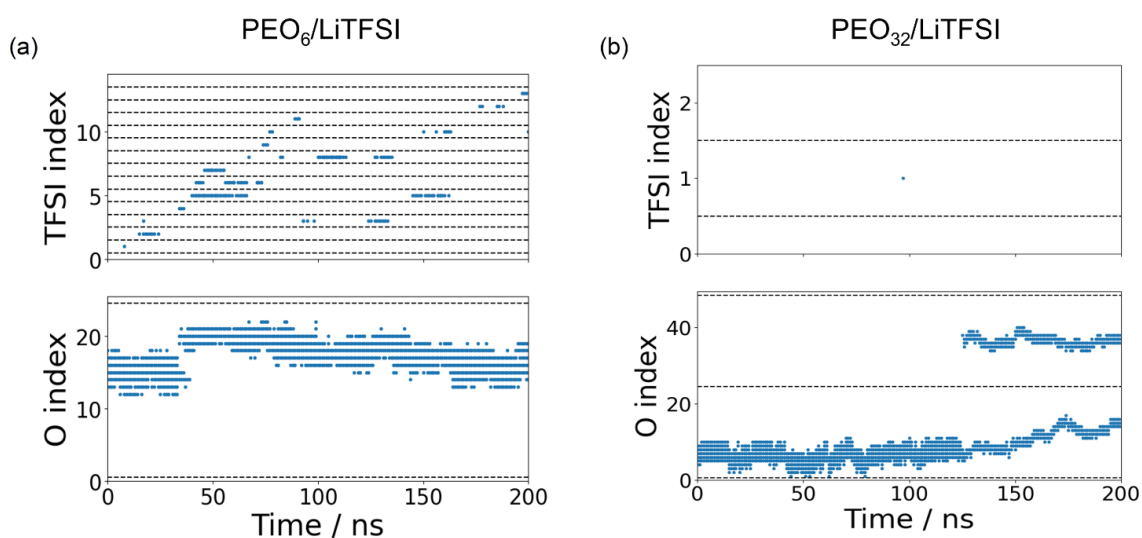

**Figure S6:** Lithium-ion transport mechanism utilizing a single lithium-ion as reference particle, for (a)  $\text{PEO}_6/\text{LiTFSI}$  and (b)  $\text{PEO}_{32}/\text{LiTFSI}$ . The O index represents the number of oxygens from PEO the lithium-ion interacts with, and the TFSI index represents the number of oxygen atoms from  $\text{TFSI}^-$  ions the lithium-ion interacts with, over the total simulation time of 200 ns. The delineated dashed line signifies the separation between either one  $\text{TFSI}^-$  ion from the next, or one PEO chain from the next.

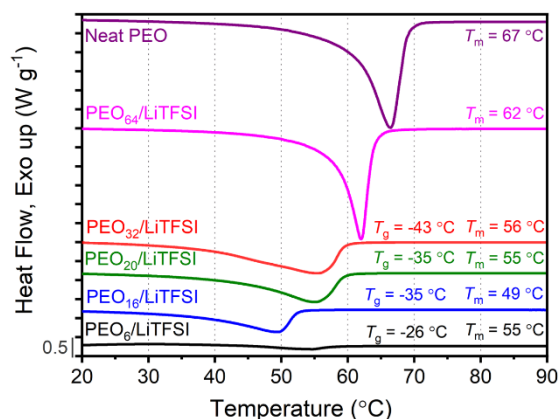

**Figure S7:** DSC traces of neat PEO (purple) and studied  $\text{PEO}_n/\text{LiTFSI}$  SPEs, where  $n = 6$  (black), 16 (blue), 20 (green), 32 (red), or 64 (magenta).

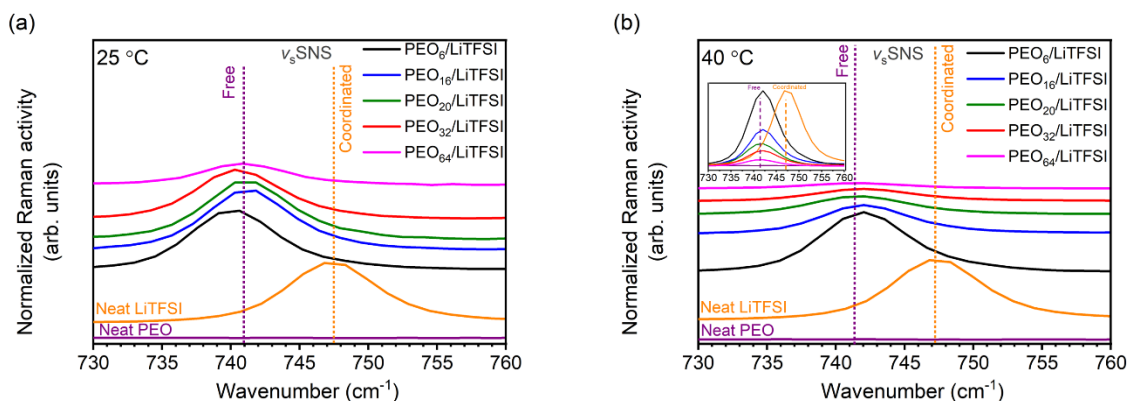

**Figure S8:** Raman spectra of the 760 - 730  $\text{cm}^{-1}$  vibrational window illustrating the S–N–S vibration for  $\text{PEO}_n/\text{LiTFSI}$  SPEs at (a) 25 °C, and (b) 40 °C, with spectra of neat LiTFSI and neat PEO recorded at 25 °C. The two vertical dotted lines correspond to the coordinated contact ion pair position at 747  $\text{cm}^{-1}$  (orange) and the free ion pair position at 740  $\text{cm}^{-1}$  (purple), respectively.

### Activation energies of the transport mechanisms

Activation energies were calculated by fitting the MD simulated ionic conductivity results to the Arrhenius equation, equation S1:

$$\sigma = A e^{-\frac{E_A}{k_B T}} \quad (\text{S1})$$

Upon linearization of equation S1, equation S2 is plotted as shown in Figure S9:

$$\ln \sigma = \ln A - \frac{E_A}{k_B \times T} \quad (\text{S2})$$

By performing a linear regression of the natural logarithm of the ionic conductivity versus the inverse of the temperature, the activation energy may be deduced from the slope (cf. Table S8).

**Table S8:** Activation energies (along with the  $R^2$  values of the fitting to the Arrhenius equation) for the studied  $\text{PEO}_{20}/\text{XTFSI}$  systems, where X = Li, Na, K, and Cs.

| Cation          | $E_A$ (eV) | $R^2$  |
|-----------------|------------|--------|
| Li <sup>+</sup> | 0.1837     | 0.9629 |
| Na <sup>+</sup> | 0.1579     | 0.9812 |
| K <sup>+</sup>  | 0.1582     | 0.9947 |
| Cs <sup>+</sup> | 0.1816     | 0.9564 |

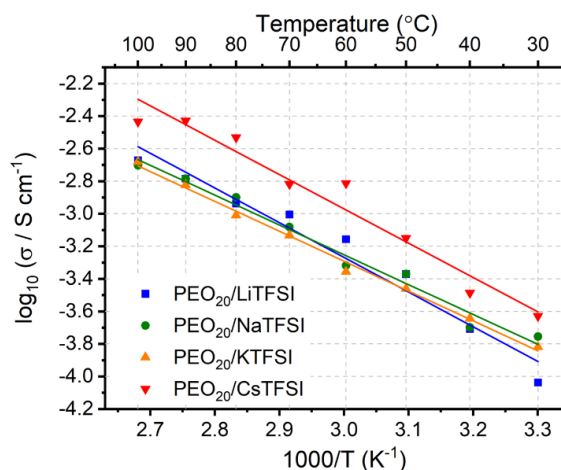

**Figure S9:** Linearized fitting of the ionic conductivity for the studied  $\text{PEO}_{20}/\text{XTFSI}$  systems; with lithium (blue), sodium (green), potassium (orange), and cesium (red) cations.



## REFERENCES

- 1 S. Pronk, S. Páll, R. Schulz, P. Larsson, P. Bjelkmar, R. Apostolov, M. R. Shirts, J. C. Smith, P. M. Kasson, D. Van Der Spoel, B. Hess and E. Lindahl, GROMACS 4.5: A high-throughput and highly parallel open source molecular simulation toolkit, *Bioinformatics*, 2013, **29**, 845–854.
- 2 L. Meabe, S. R. Peña, M. Martínez-Ibañez, Y. Zhang, E. Lobato, H. Manzano, M. Armand, J. Carrasco and H. Zhang, Insight into the ionic transport of solid polymer electrolytes in polyether and polyester blends, *Journal of Physical Chemistry C*, 2020, **124**, 17981–17991.
- 3 N. Kondratyuk, V. Nikolskiy, D. Pavlov and V. Stegailov, GPU-accelerated molecular dynamics: State-of-art software performance and porting from Nvidia CUDA to AMD HIP, *Int J High Perform Comput. Appl*, 2021, **35**, 312–324.
- 4 C. Kutzner, S. Páll, M. Fechner, A. Esztermann, B. L. de Groot and H. Grubmüller, More bang for your buck: Improved use of GPU nodes for GROMACS 2018, *J Comput. Chem*, 2019, **40**, 2418–2431.
- 5 A. S. L. Gouveia, C. E. S. Bernardes, L. C. Tomé, E. I. Lozinskaya, Y. S. Vygodskii, A. S. Shaplov, J. N. C. Lopes and I. M. Marrucho, Ionic liquids with anions based on fluorosulfonyl derivatives: from asymmetrical substitutions to a consistent force field model, *Physical Chemistry Chemical Physics*, 2017, **19**, 29617–29624.
- 6 J. N. Canongia Lopes and A. A. H. Pádua, CL&P: A generic and systematic force field for ionic liquids modeling, *Theor Chem Acc*, 2012, **131**, 1129.
- 7 U. Oteo, M. Martínez-Ibañez, I. Aldalur, E. Sanchez-Diez, J. Carrasco, M. Armand and H. Zhang, Improvement of the Cationic Transport in Polymer Electrolytes with (Difluoromethanesulfonyl)(trifluoromethanesulfonyl)imide Salts, *ChemElectroChem*, 2019, **6**, 1019–1022.
